# Supplementary material for: A three-dimensional nanoporous flexible network of ‘square-planar’ copper(ii) centres with an unusual topologyElectronic supplementary information (ESI) available: XRPD spectra. See http://www.rsc.org/suppdata/cc/b2/b202588d/
Source: Royal Society of Chemistry journal article supplement (doi:10.1039/b202588d), 2002-05-23
Supplement: b202588d.doc [file b202588d.doc]

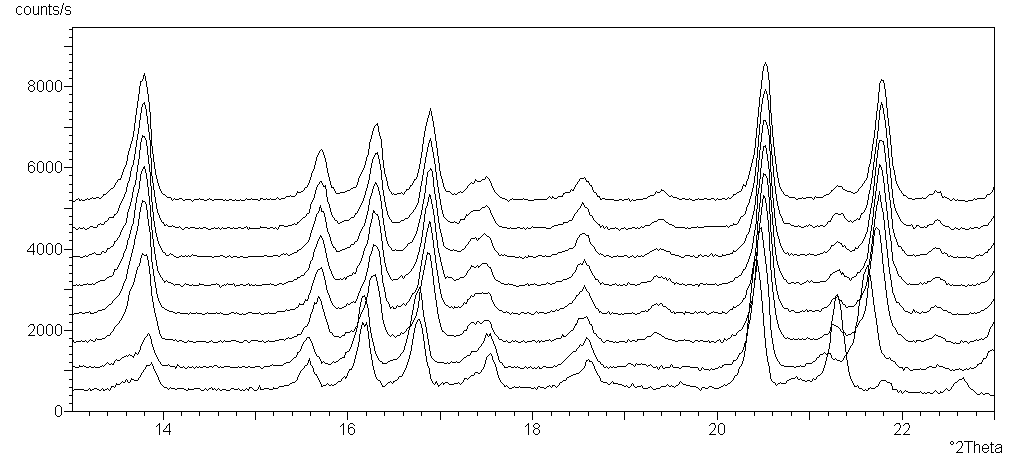


**Fig. 1S** The upper part shows the XRPD monitoring (every 9 min. from the bottom to the top) of the solvent depletion of the network of **1** after treatment with amyl acetate. The lower part reports the corresponding variation of the cells parameters with time, obtained by Rietveld analysis of the profiles. The decrease of ***c*** is accompained by an increase of ***a***, as expected since the two axes are constrained through the relationship 2|***a***|2 + |***c***|2 = 4Lr2 , with Lr (the rhombic edge) almost constant and equal to 2 × (Cu…Cu), *ca.* 22.1 Å*.*

Supplementary Material (ESI) for Chemical Communications

This journal is © The Royal Society of Chemistry 2002
